# Supplementary material for: 4- tert -Butylpyridine coordination to alkylammoniums in perovskites
Source: Royal Society of Chemistry journal article supplement (doi:10.1039/d5ta08091f), 2025-12-15
Supplement: d5ta08091f1.pdf [file d5ta08091f1.pdf]

Supplementary information

# 4-*tert*-butylpyridine coordination to alkylammoniums in perovskites

*Naoyuki Nishimura\*, Yoyo Hinuma, Hiroyuki Kanda, Takuro N. Murakami*

National Institute of Advanced Industrial Science and Technology (AIST), 1-1-1 Higashi, Tsukuba,  
Ibaraki 305-8565, Japan.

\*Corresponding Author

Naoyuki Nishimura, E-mail: [naoyuki-nishimura@aist.go.jp](mailto:naoyuki-nishimura@aist.go.jp)

## 1. Molecular structures

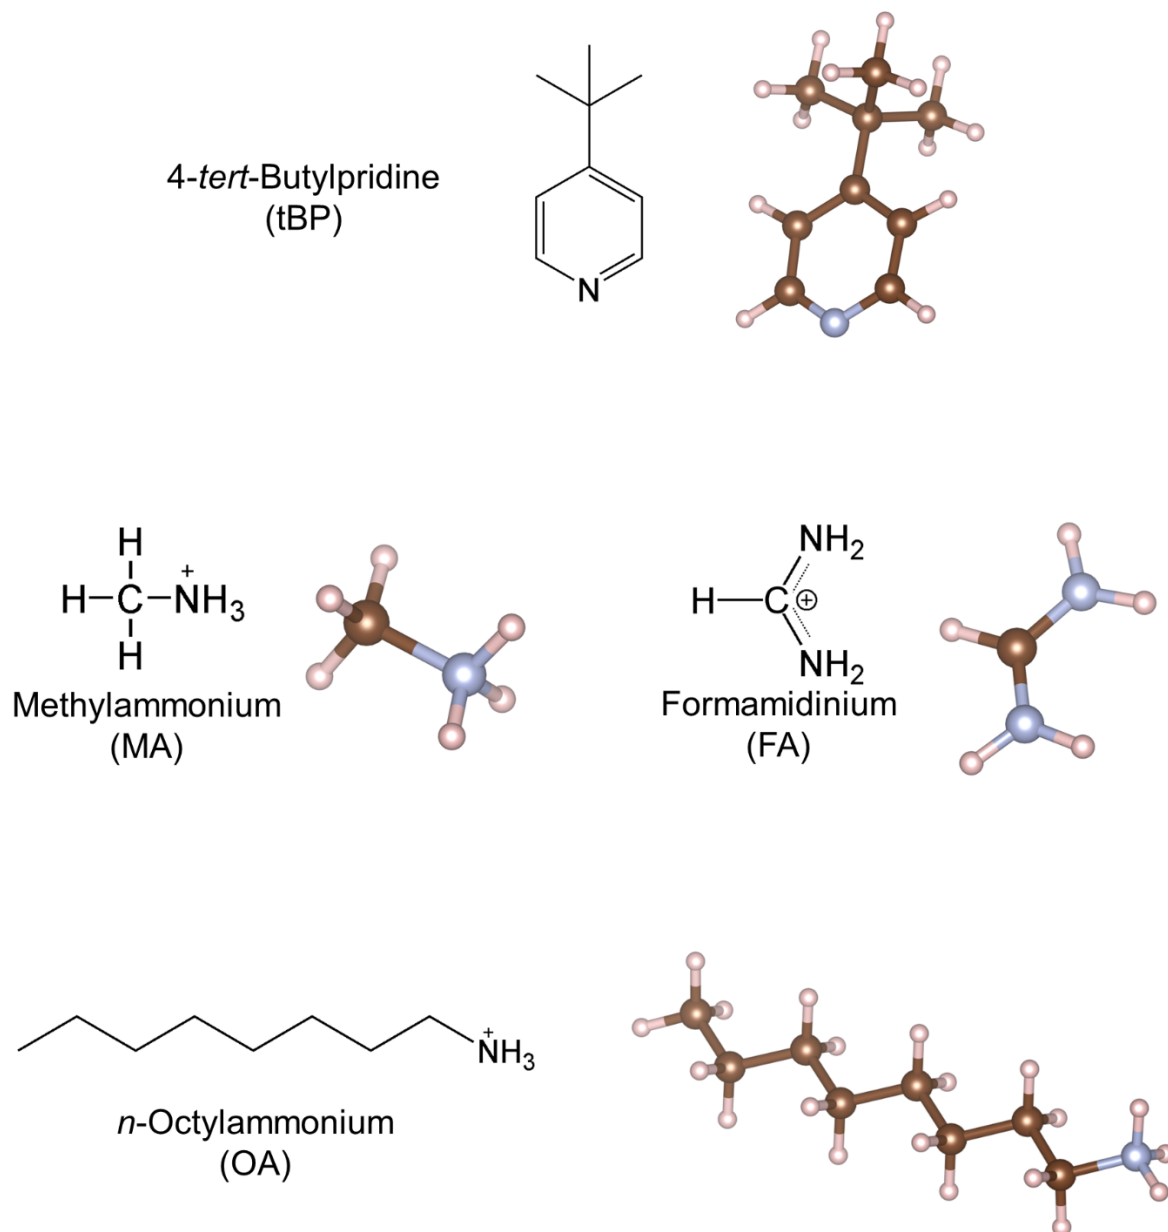

**Fig. S1** Molecular structures of 4-*tert*-butylpyridine (tBP), methylammonium (MA), formamidineum (FA), and *n*-octylammonium (OA)

## 2. Spontaneous perovskite passivation by OA-TFSI

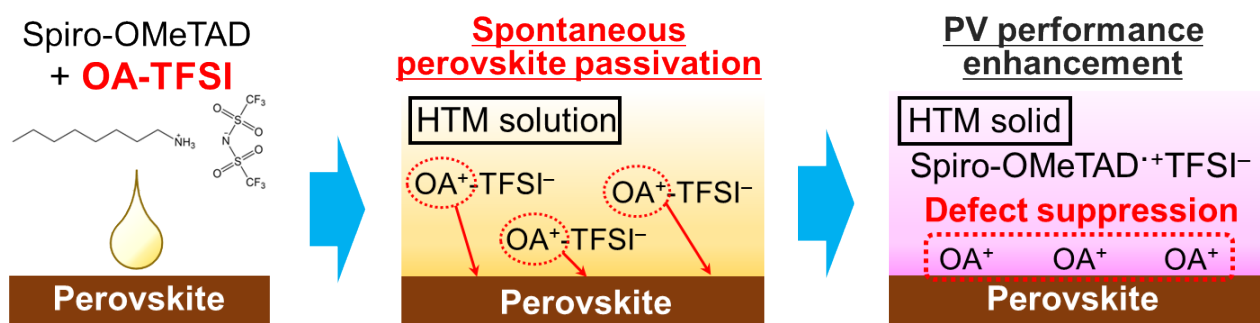

**Fig. S2** Schematic of spontaneous perovskite passivation during HTM deposition using an OA-TFSI-containing Spiro-OMeTAD solution; during deposition, OA cations spontaneously migrate to the perovskite surface and effectively suppress surface defects, enhancing the photovoltaic (PV) performance.

### 3. tBP coordination to alkylammoniums

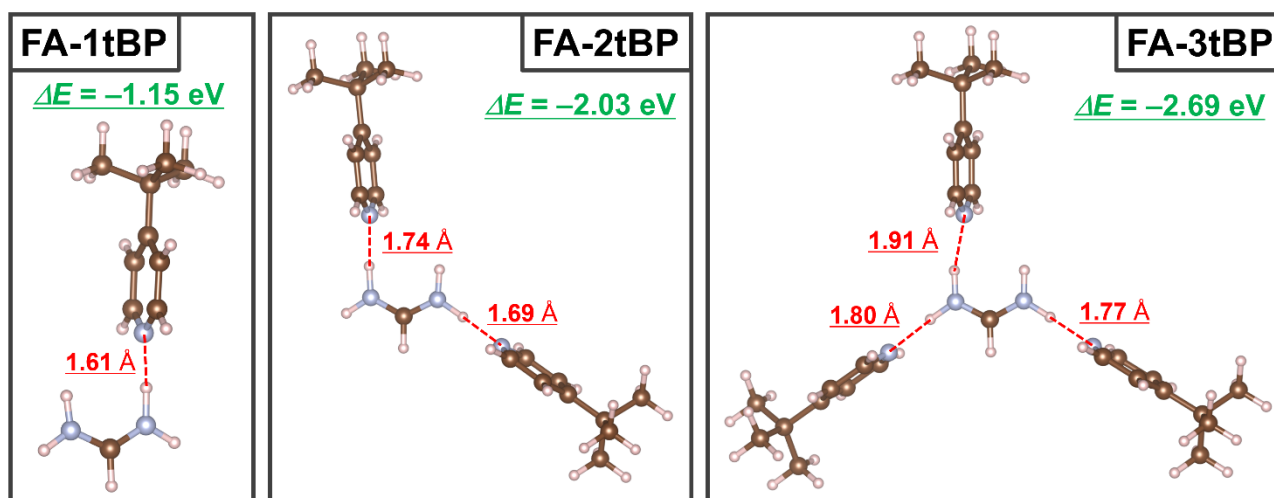

**Fig. S3** tBP coordination to FA with 1, 2, and 3 tBP molecules

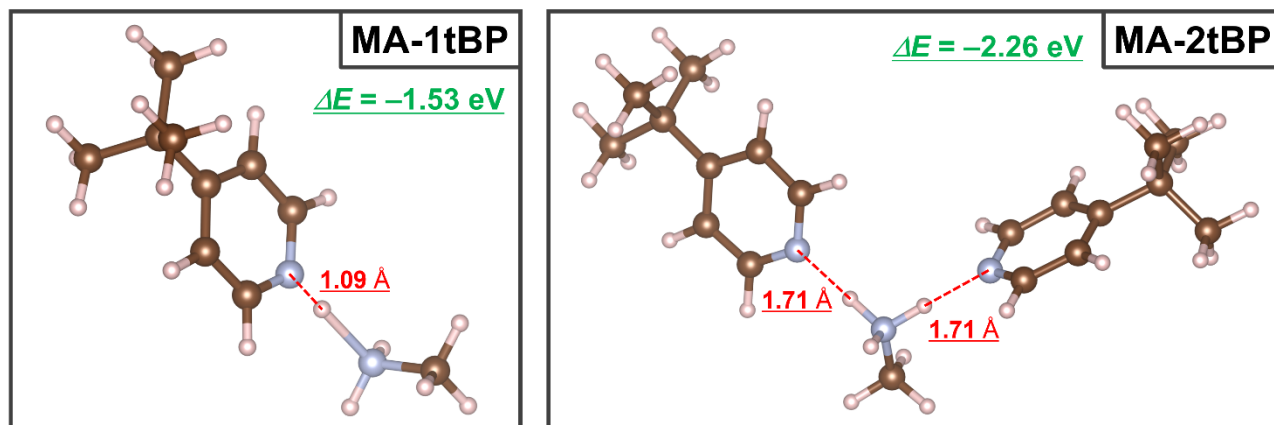

**Fig. S4** tBP coordination to MA with 1 and 2 tBP molecules

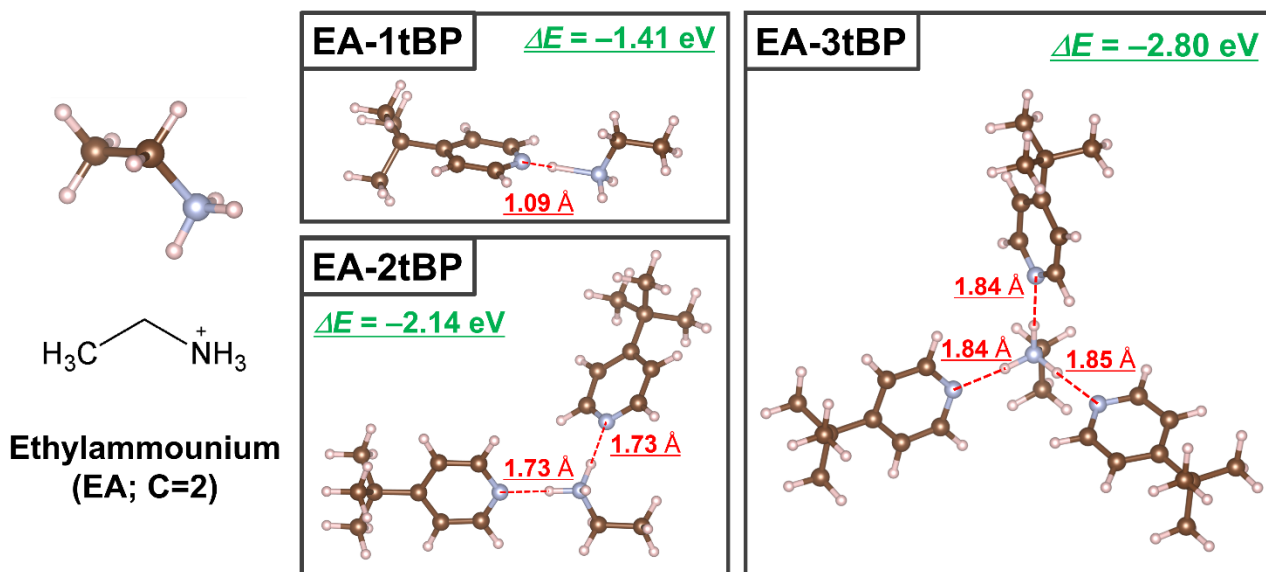

Fig. S5 tBP coordination to ethylammonium (EA) with 1, 2, and 3 tBP molecules

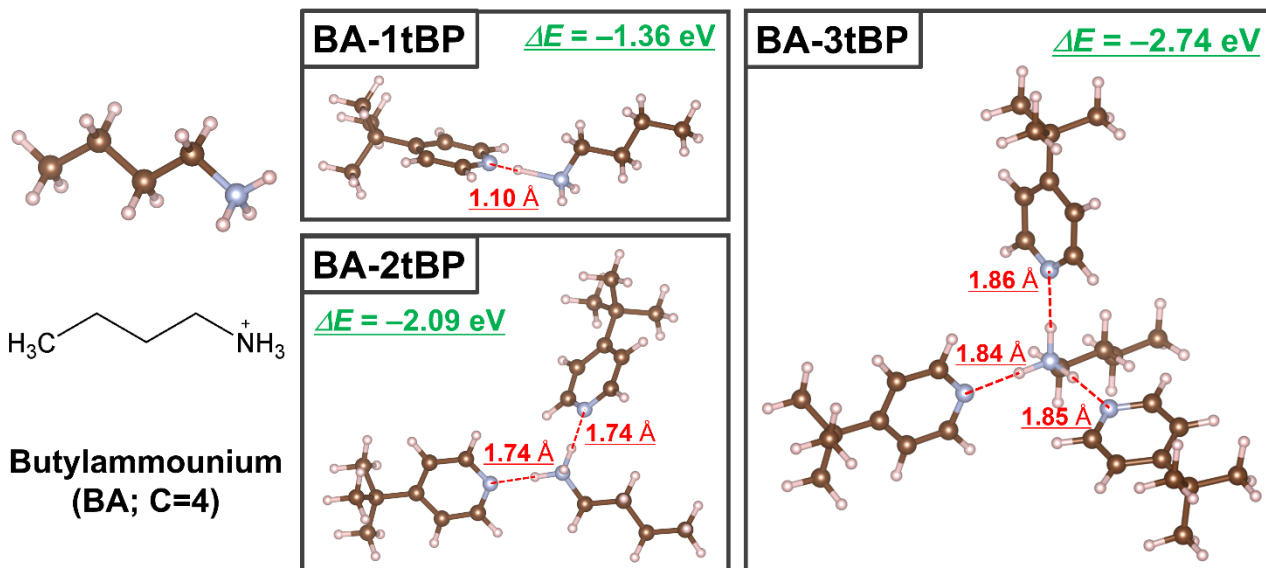

Fig. S6 tBP coordination to butylammonium (BA) with 1, 2, and 3 tBP molecules

**Table S1.** Summary of the net energy of tBP coordination

| Molecule | Coordination energy<br>via strong hydrogen bonding ( $\Delta E$ ; eV) |       |       |       |
|----------|-----------------------------------------------------------------------|-------|-------|-------|
|          | tBP×1                                                                 | tBP×2 | tBP×3 | tBP×4 |
| FA       | -1.15                                                                 | -2.03 | -2.69 | -3.15 |
| MA       | -1.53                                                                 | -2.26 | -2.96 |       |
| EA       | -1.41                                                                 | -2.14 | -2.80 |       |
| BA       | -1.36                                                                 | -2.09 | -2.74 |       |
| OA       | -1.25                                                                 | -2.07 | -2.72 |       |

#### 4. Spontaneous perovskite passivation mechanism with OA-3tBP

**Table S2.** Energy changes associated with OA-xtBP adsorption on an FAPbI<sub>3</sub> surface

|                  | Free | OA-3tBP<br>adsorption | Intermediate | OA-2tBP<br>adsorption | OA-1tBP<br>adsorption | Sole OA<br>adsorption |
|------------------|------|-----------------------|--------------|-----------------------|-----------------------|-----------------------|
| Net system       | 0    | −1.37                 | −1.05        | −0.9                  | −0.47                 | −0.23                 |
| tBP dissociation | —    | —                     | —            | 0.68                  | 1.40                  | 2.90                  |
| OA-focused       | 0    | −1.37                 | −1.05        | −1.58                 | −1.87                 | −3.13                 |

The OA-focused absorption energies (Fig. 3) were calculated using the following equation:

$$E_{\text{OA-focus}} = E_{\text{net}} - E_{\text{tBPdiss}} \quad (\text{S1})$$

where  $E_{\text{OA-focus}}$ ,  $E_{\text{net}}$ , and  $E_{\text{tBPdiss}}$  denote the OA-focused absorption energy, net energy of the system, and energy for tBP dissociation from OA in the calculation slab, respectively. The dissociation energy of OA–tBP was calculated by moving the tBP molecules 15 Å away from the slab, one at a time. When multiple tBP molecules were close to each other in a vacuum after this procedure, the tBP molecules were moved by up to a few Å to separate them.

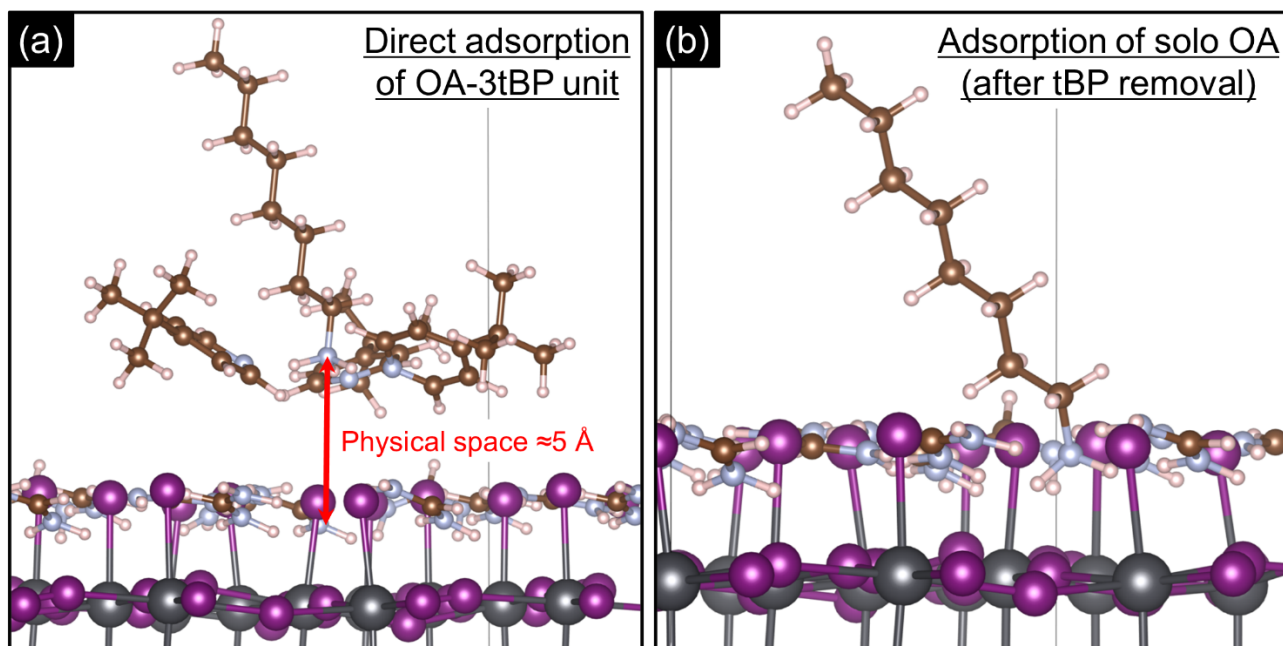

**Fig. S7** Enlarged illustration of OA (unit) adsorption on a perovskite surface shown in Fig. 3: (a) direct adsorption of OA-3tBP unit forming substantial physical space between OA and the perovskite surface, and (b) adsorption of solo OA after the removal of all tBP molecules

## 5. Cross-sectional SEM images of perovskite solar cells (PSCs)



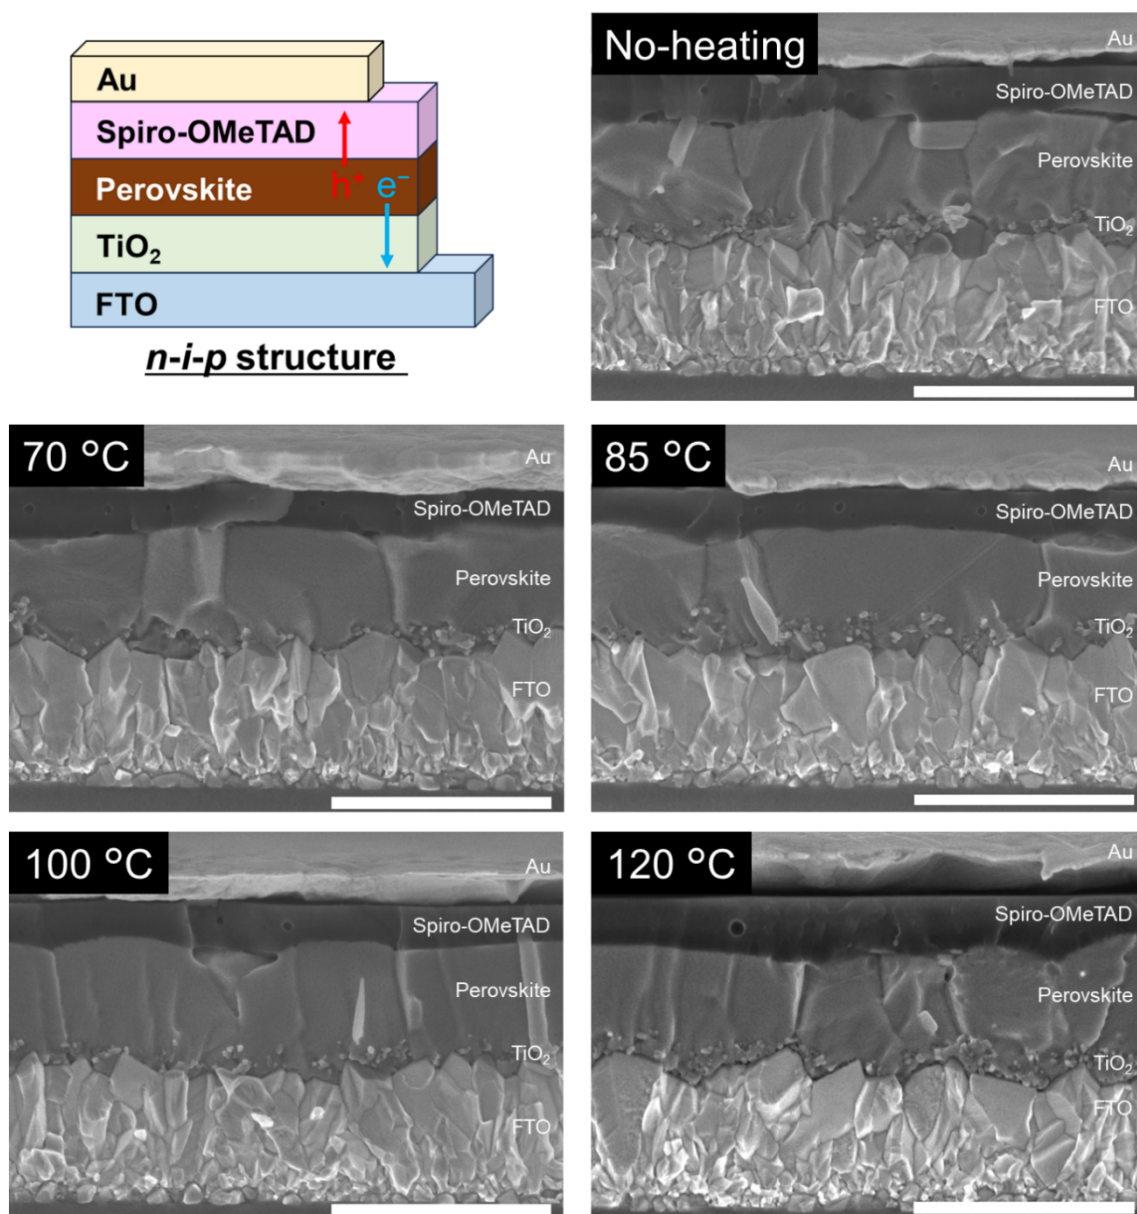

**Fig. S8** Cross-sectional images of the PSCs obtained using OA-TFSI HTM additives with and without post-heating treatment at various temperatures

## 6. Compositional depth analysis

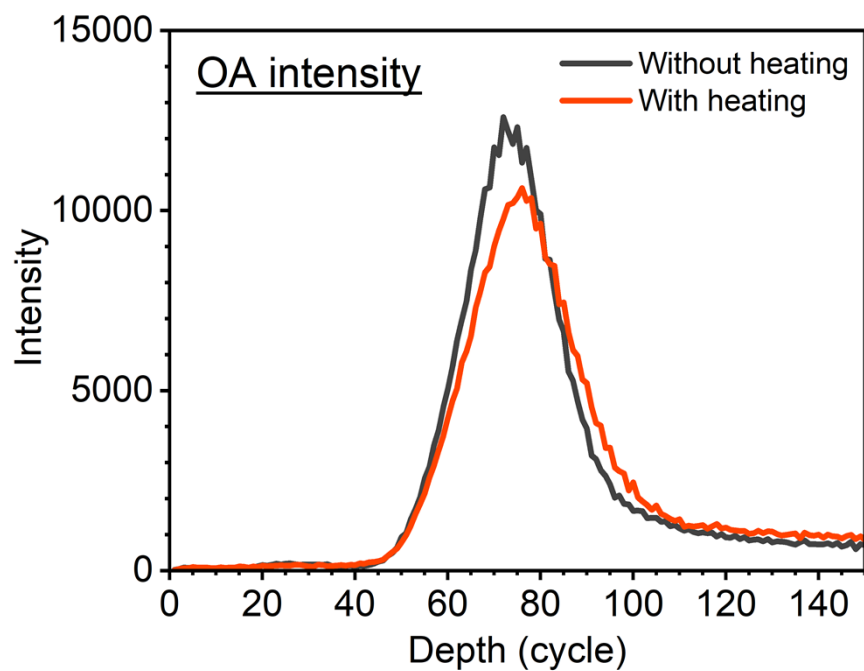

**Fig. S9** Comparison of OA intensities of ToF-SIMS for the samples with and without post-heating (Fig. 4a and 4b) with a linear scale on the y-axis.

## 7. PV performance

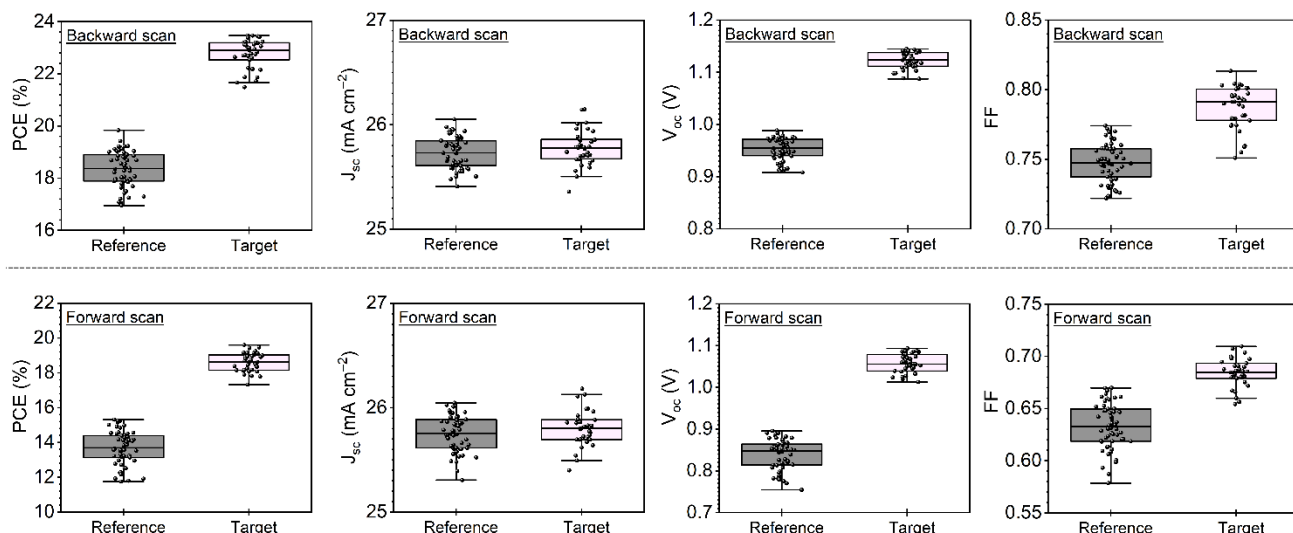

**Fig. S10** PV parameter distribution of PSCs with a conventional set of dopants (Li-TFSI + tBP + FK209: reference) and OA-TFSI combining optimal post-heating at 85 °C (target)

**Table S3** PV parameters of PSCs with a conventional set of dopants (reference) and OA-TFSI combining optimal post-heating at 85 °C (target)

| Sample           | Scan     | Average / Best | $J_{sc}$ (mA/cm <sup>2</sup> ) | $V_{oc}$ (V) | FF          | PCE (%)    |
|------------------|----------|----------------|--------------------------------|--------------|-------------|------------|
| Reference        | Backward | Best           | 25.9                           | 0.99         | 0.77        | 19.8       |
|                  |          | Average        | 25.7 ± 0.2                     | 0.95 ± 0.02  | 0.75 ± 0.01 | 18.3 ± 0.7 |
|                  | Forward  | Best           | 25.9                           | 0.88         | 0.67        | 15.2       |
|                  |          | Average        | 25.7 ± 0.2                     | 0.84 ± 0.04  | 0.63 ± 0.02 | 13.7 ± 1   |
| OA-TFSI<br>85 °C | Backward | Best           | 25.8                           | 1.14         | 0.80        | 23.5       |
|                  |          | Average        | 25.8 ± 0.2                     | 1.12 ± 0.02  | 0.79 ± 0.02 | 22.8 ± 0.5 |
|                  | Forward  | Best           | 25.8                           | 1.09         | 0.68        | 19.1       |
|                  |          | Average        | 25.8 ± 0.2                     | 1.06 ± 0.02  | 0.68 ± 0.01 | 18.6 ± 0.5 |

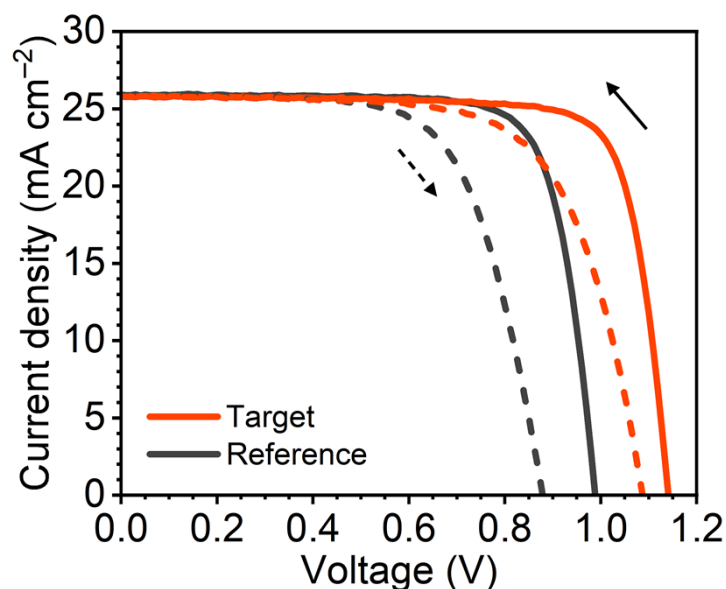

**Fig. S11**  $J$ - $V$  curves of the best-performing PSCs with a conventional set of dopants (reference) and OA-TFSI combining optimal post-heating at 85 °C (target)

Fig. S10, S11, and Table S3 show the PV performance of the PSCs with the conventional set of dopants (Li-TFSI, tBP, and FK209) or OA-TFSI subjected to optimal post-heating at 85 °C. PSCs with OA-TFSI exhibited better PV performance, confirming its spontaneous perovskite passivation effects. For instance, the average power conversion efficiency (PCE) of PSCs with OA-TFSI was higher ( $22.8 \pm 0.5$  % (best: 23.5 %)) than those of PSCs with the conventional set of dopants ( $18.3 \pm 0.7$  % (best: 19.8 %)) in backward scan, primarily attributed to an increase in the open-circuit voltage ( $V_{oc}$ ) from  $0.95 \pm 0.02$  V (best: 0.99 V) to  $1.12 \pm 0.02$  V (best: 1.14 V).

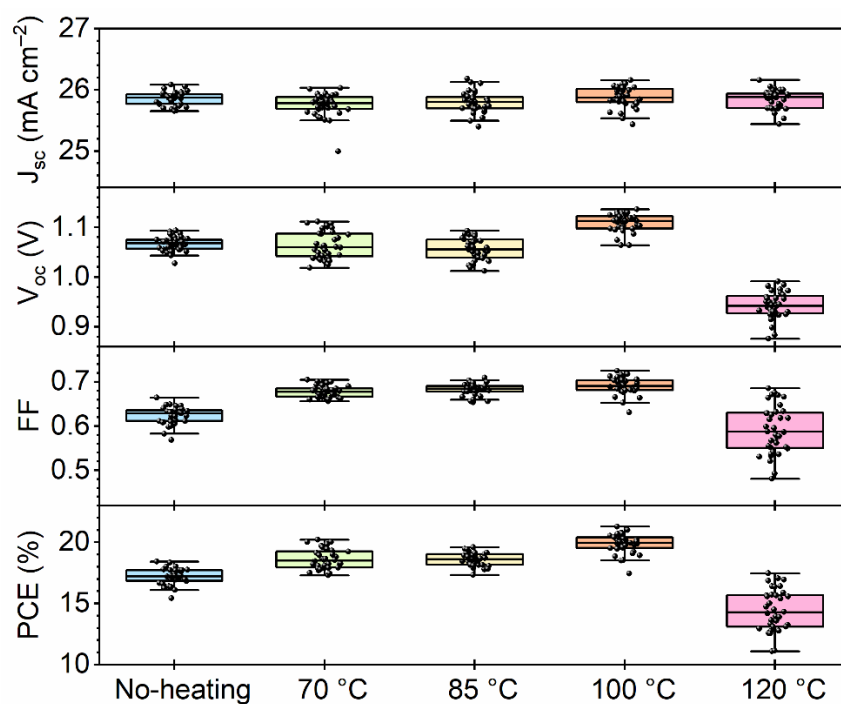

**Fig. S12** PV parameter distributions of PSCs with OA-TFSI and post-heating treatments at various temperatures in forward scan (backward scan: [Fig. 5](#))

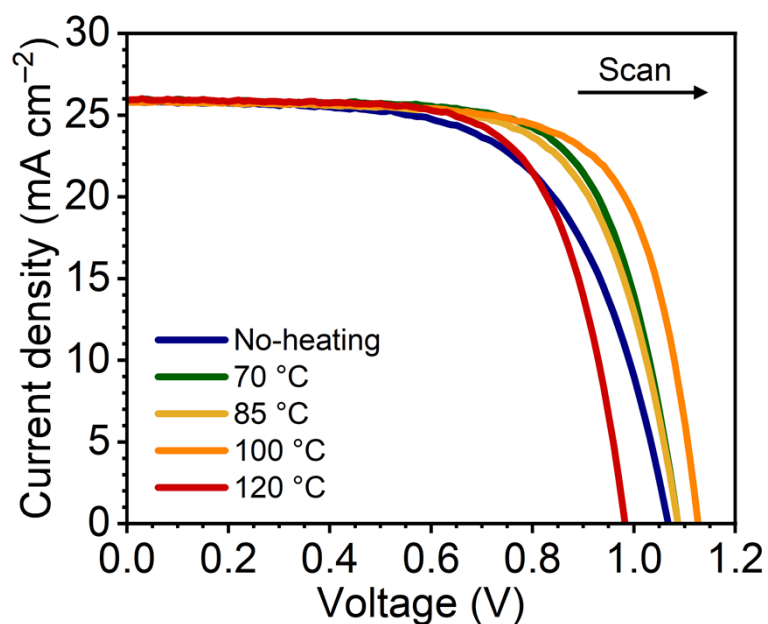

**Fig. S13**  $J-V$  curves of PSCs with OA-TFSI and post-heating treatments at various temperatures in forward scan (backward scan: [Fig. 6a](#))

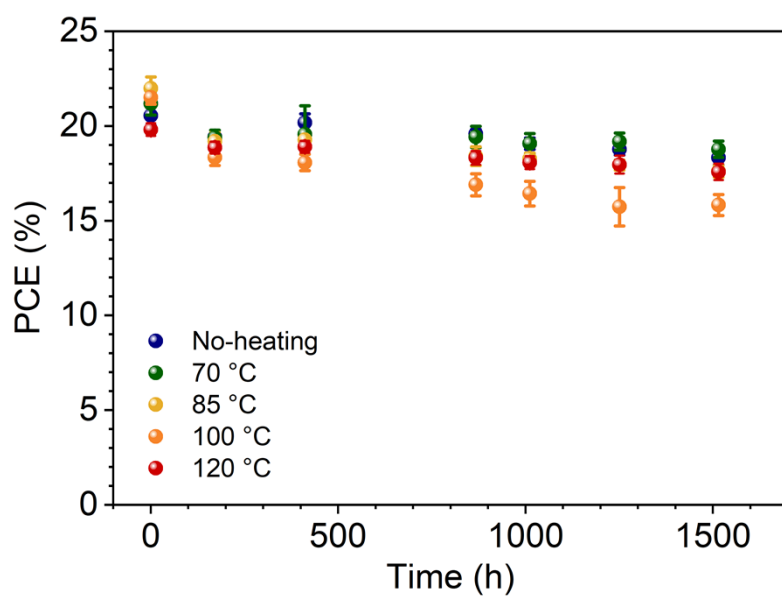

**Fig. S14** Long-term stability of PSCs in the presence of humidity (50% relative humidity at 30 °C)

without encapsulation

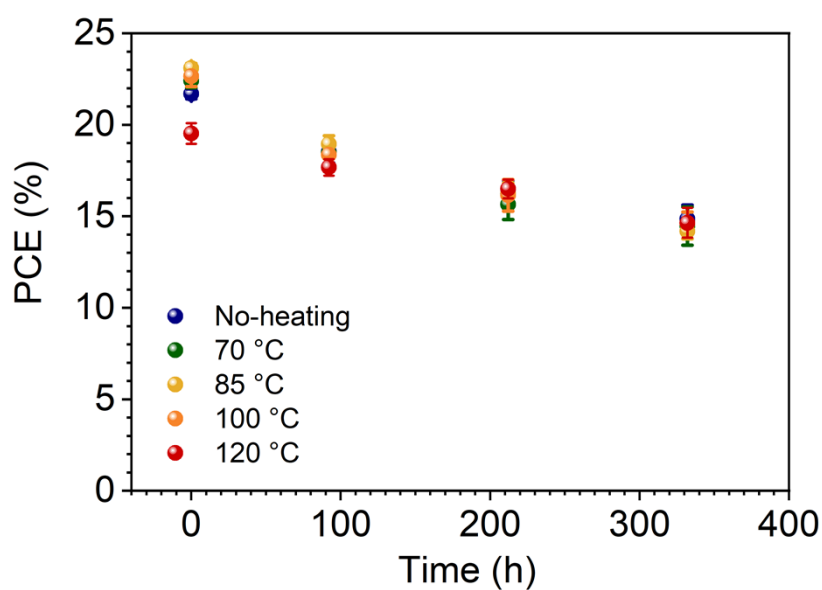

**Fig. S15** Long-term stability of PSCs at an elevated temperature of 65 °C in a nitrogen atmosphere

without encapsulation

**Table S4** Series resistances ( $R_s$ ) of PSCs and PL lifetimes ( $\tau$ ) of spiro-OMeTAD/perovskite bilayer samples prepared using OA-TFSI + tBP with post-heating at various temperatures, corresponding to

Fig. 7

| Post-heating temperature | Series resistance<br>$R_s$ ( $\Omega$ ) | PL lifetime<br>$\tau$ (ns) |
|--------------------------|-----------------------------------------|----------------------------|
| No-heating               | $29 \pm 4$                              | $25.0 \pm 0.9$             |
| 70 °C                    | $22 \pm 2$                              | $19.5 \pm 0.3$             |
| 85 °C                    | $18 \pm 1$                              | $8.22 \pm 0.15$            |
| 100 °C                   | $19 \pm 2$                              | $3.88 \pm 0.23$            |
| 120 °C                   | $21 \pm 3$                              | $2.93 \pm 0.07$            |
